# Supplementary material for: Motif effects in Affymetrix GeneChips seriously affect probe intensities
Source: PubMed Central journal article supplement — Nucleic Acids Res. 2012 Aug 13;40(19):9705–16. doi: 10.1093/nar/gks717 (PMC3479185; doi:10.1093/nar/gks717), 2012-08-13
Supplement: supp_gks717_nar-01326-f-2012-File003.pdf [file supp_gks717_nar-01326-f-2012-File003.pdf]

## Evolution of the underlying model

The value returned by a probe is the consequence of the interaction between the probe's 25-base sequence and the proportions of the various sequences in the biological material to which the microarray is introduced. The simple model given in the paper has its genesis in a rather complex model, the ingredients of which we now define:

|               |                                                                                                                                                                                             |
|---------------|---------------------------------------------------------------------------------------------------------------------------------------------------------------------------------------------|
| $I_{i,j}$     | The observed intensity for probe $i$ in a probeset intended to measure the expression level of gene $G$ for CEL file $j$ .                                                                  |
| $K_j$         | The file-specific scaling required because the quantity of genetic material available for binding varies considerably from one CEL file to another                                          |
| $\theta_i$    | The extra propensity of probe $i$ (as opposed to an average probe) to stick to a random selection of genetic material. We choose the values so that $\sum_{\forall i} \log(\theta_i) = 0$ . |
| $\gamma_j$    | The proportion of fragments for CEL file $j$ that correspond to gene $G$ .                                                                                                                  |
| $\phi_j(M)$   | The proportion of fragments for CEL file $j$ that would bind with the motif $M$ .                                                                                                           |
| $r_G$         | A multiplier, assumed the same for all probes, that applies to the binding of a probe to the gene for which it is intended.                                                                 |
| $r_M$         | A motif-specific multiplier that applies to the binding of a probe with material containing the reverse complement of motif $M$ .                                                           |
| $\delta_i(M)$ | A multiplier that takes the value 1 if probe $i$ contains motif $M$ , and is otherwise zero.                                                                                                |

The algebra is greatly simplified if the usual error term is omitted until a final model is reached. Initially we have:

$$I_{i,j} = K_j \theta_i \left\{ \gamma_j r_G + (1 - \gamma_j) \sum_{\forall M} r_M \delta_i(M) \phi_j(M) \right\}$$

If gene  $G$  is unexpressed then  $\gamma_j = 0$  so that:

$$I_{i,j} = K_j \theta_i \left\{ \sum_{\forall M} r_M \delta_i(M) \phi_j(M) \right\}$$

Taking logarithms:

$$\log(I_{i,j}) = \log(K_j) + \log(\theta_i) + \log \left\{ \sum_{\forall M} r_M \delta_i(M) \phi_j(M) \right\}$$

We now standardise by summing over  $i$ , subtracting the overall mean and scaling to a unit variance. The latter makes comparisons across CEL files and across platforms easier. The resulting standardised values are given by:

$$S_{ij} = \log(\theta_i) + \log \left\{ \sum_{\forall M} r_M \delta_i(M) \phi_j(M) \right\}$$

Consider a particular 5-base motif,  $M_0$ , say, which typically occurs in tens of thousands of probes. Rewrite the relation as:

$$S_{ij} = \log \{ r_{M_0} \phi_j(M_0) \} + \log(\theta_i) + \log \left\{ \sum_{\forall M \neq M_0} [r_M \phi_j(M) / r_{M_0} \phi_j(M_0)] \delta_i(M) \right\}$$

We now average over all probes containing  $M_0$ . Each probe will have a different relation, but all will have the same first term and the average of the remaining terms will be near zero. An approximation for the average,  $\bar{S}_{M_0}$ , is therefore:

$$\bar{S}_{M_0} = \log \{ r_{M_0} \} + \log \{ \phi_j(M_0) \} + \epsilon$$

In practice some of the probes containing  $M_0$  will correspond to expressed genes, so that these probe values may be dominated by their  $\gamma_j r_G$  component. However, because the average is being taken over so many probes, it is reasonable to assume that both

the overall contribution from those genes and the contribution from the  $\log \{\phi_j(M_0)\}$  term can be jointly represented by the sum of a constant,  $\mu$ , and an error,  $\epsilon$ , giving the simple linear model

$$\bar{S}_M = \mu + \lambda_M + \epsilon.$$

In this formulation, each 5-base motif would have its own parameter,  $\lambda_M$ ; but, in what follows, we write the 1024 individual parameters as linear combinations of a much smaller number of parameters that describe the base sequences in the various motifs, and thereby provide insights into the factors influencing probe values.

## *F*-tests for the comparison of nested models

We illustrate the procedure using Model 4 and Model 4a. There are 1024 observations, while Model 4 contains 3 mononucleotide parameters, 15 dinucleotide parameters, and dummy parameters for GGGG and CCGCCTCCC. Model 4a includes one further parameter (the dummy for CCGCC). The ANOVA table is in outline as follows:

| Source of variation  | Degrees of freedom |
|----------------------|--------------------|
| Model 4              | 20                 |
| The CCGCC dummy      | 1                  |
| Residual             | 1002               |
| Total about the mean | 1023               |

Assuming Model 4a provides a reasonable fit to the data, the residual mean square provides an estimate of the experimental error variance ( $\sigma^2$ ). If the CCGCC dummy parameter is not required, then the sum of squares corresponding to that term is also an estimate of  $\sigma^2$ , and the ratio of the two estimates is an observation from an *F*-distribution with the corresponding degrees of freedom (1 and 1002).

In practice, the estimate of  $\sigma^2$  provided by the residual mean square is biased upwards, since the addition of further dummy parameters materially improves the fit. However, since Model 4 explains 85% of the variation in the 1024 group averages, the bias is very small. The *F*-test is, in any case, being used only as an indicator of dummy variables that may need to be added to the current model.

## Further details concerning the detection of apparently relevant motifs

Model 5 explained an average 86% of the variation in the motif averages. Models 5a-5c were significant improvements on Model 5 (using the 1% level) only on 2.7%, 0.04% and 0.33% of occasions. Persistent outliers to Model 5 were ACCGC 69%; CCCGC 65%; GCCCC 61%; CGCCC 44%; TCCGC 40%. Taking these together with CCGCC, which is already present in model 4a, we have the components of the 8-base motif CCGCCTCCC, and also ACCGC and TCCGC. The next models considered are therefore:

$$\begin{aligned} \text{Model 6:} & \quad v = M_6 + \epsilon + \text{ where } M_6 = M_4 + \beta_{CCCCCTCdCCCCCTC} + \\ & \quad \beta_{CCCGCCCCdCCCGCCCC} + \beta_{(AT)CCGCd(AT)CCGC} \\ \text{Models 6a to 6d:} & \quad v = M_6 + \epsilon + \text{ one of } \beta_{CCCGCdCCCGC} \text{ to } \beta_{GCCCCdGCCCC} \\ \text{Models 6e and 6f:} & \quad v = M_6 + \epsilon + \text{ either } \beta_{ACCGCdACCGC} \text{ or } \beta_{TCCGCdTCCGC} \end{aligned}$$

Here the dummy variable  $d_{(AT)CCGC}$  takes the value 1 for the motifs ACCGC and TCCGC and is otherwise zero.

Model 6 explained an average 87% of the variation in the motif averages. At the 1% level only  $d_{CCGCC}$  (on 4.3% of occasions) and  $d_{GCCCC}$  (3.2%) provided significant improvements on Model 6. On this occasion the more prominent outliers were those that were consistently over-estimated: GCCGG 80%; CCGGG 66%; AGGCC 62%; and GGCCA 43%. They suggest examination of the following models

$$\begin{aligned} \text{Model 7:} & \quad v = M_7 + \epsilon + \text{ where } M_7 = M_6 + \beta_{GCCGGdGCCGG} + \beta_{AGGCCdAGGCCA} \\ \text{Models 7a:} & \quad v = M_7 + \epsilon + \beta_{GCCGGdGCCGG} \\ \text{Models 7b:} & \quad v = M_7 + \epsilon + \beta_{AGGCCdAGGCC} \end{aligned}$$

Model 7 explains on average 88% of the variation in motif averages and Models 7a and 7b are not significantly better.

Table 1: GSEs having many outliers for Model 7.

| GSE   | $\overline{R^2}$ | No. files | Motifs with outlier values of 0.5 (s.d.) or more                                                               | Apparently underlying motifs       |
|-------|------------------|-----------|----------------------------------------------------------------------------------------------------------------|------------------------------------|
| 7451  | 51               | 20        | AGATC (3); GATCT (9); ATCTC (11); TCTCC (14);<br>CTCCC (15); TCCCC (10)<br>CCAGC (10); CAGCA (5);<br>TCCCA (3) | AGATCTCCCC<br>CCAGCA<br>TCCCA      |
| 9844  | 54               | 38        | GATCT (26); ATCTC (36); TCTCC (38); CTCCC (38); TCCCC (37)<br>CCAGC (16);<br>TCCCA (11); TCCCT (8);            | GATCTCCCC<br>CCAGC<br>TCCCA; TCCCT |
| 11524 | 77               | 30        | ATCTC (7); TCTCC (24); CTCCC (24); TCCCC (18)<br>TCCCT (2)                                                     | ATCTCCCC<br>TCCCT                  |
| 7538  | 79               | 24        | ATGCG (3); TTGCG (12); TGC GG (16); GCGGT (16);<br>CGGTC (16); GGTCT (12); GTCTC (8)                           | (A/T)TGC GG TCTC                   |
| 3678  | 82               | 14        | TGC GG (4); GCGGT (8); CGGTC (5); GGTCT (2)                                                                    | TGC GG TCT                         |
| 2125  | 83               | 45        | TCTCC (10); CTCCC (4); TCCCC (4)                                                                               | TCTCCC                             |
| 5850  | 81               | 12        | TTTTT (5)<br>TGC GG (1); GCGGT (1)                                                                             | TTTTT<br>TGC GG T                  |
| 2634  | 82               | 17        | ACGCC (3); TCGCC (11); CGCCG (17); GCCGC (9);<br>ACTGG (3); CTGGC (7);                                         | (A/T)CGCCGC<br>ACTGGC              |
| 6982  | 82               | 2         | CCGTC (2); TCTCC (2); TCGCC (2); CCGCT (2)<br>CTCCT (2); TGCCT (2)                                             |                                    |
| 6519  | 83               | 12        | TCCCC (9); CTCCT (7); TCTCC (3)                                                                                |                                    |
| 10270 | 89               | 48        | TTTTT (14)                                                                                                     | TTTTT                              |
| 10406 | 86               | 24        | CCGTC (12); TCGCC (2); CCGCT (2)                                                                               |                                    |
| 8121  | 87               | 75        | CTCCT (14)                                                                                                     | CTCCT                              |
| 10609 | 86               | 91        | TCGCC (7); ACGCC (5); CCGCT (5); TGCCT (5);<br>GCCGC (5); CCGTC (3)                                            |                                    |
| 9692  | 86               | 45        | CTCCT (7)                                                                                                      | CTCCT                              |
| 5816  | 86               | 58        | TCTCC (6); CTCCC (6)                                                                                           | TCTCCC                             |

Although Model 7 explains on average 88% of the variation in motif averages, there are a few experiments where the value of  $R^2$  is far lower. We can identify the nature of the differences from the normal by examining the motifs that are severely under-estimated in these experiments. (All extreme outliers are under-estimates). The results are summarised in Table 1.

For our next model, Model 8 we simply added dummy variables to take account of these outliers, so that the resulting model provided an excellent fit ( $R^2 > 80\%$ ) for nearly every CEL file examined.

We next turned our attention to other Affymetrix platforms, commencing with the final model chosen for the Plus2 platform, proceeding in a corresponding fashion, and adding further terms as the results dictated. The result was a cumbersome model with 40 dummy variables, many of which appeared generally unnecessary. To focus on the motifs of greatest relevance, we tested each parameter to determine whether its removal resulted in a worsening of the fit of the model that was statistically significant at the 0.01% level (an arbitrary choice, but necessarily extreme given the number of tests performed). Most parameters provided at least one result that was significant at that level, so a further requirement was that the significance level should be achieved for at least 10% of the CEL files for at least one of the nine platforms examined. This resulted in the model with 26 dummy variables listed in Table 3 of the paper.

**The groups of experiments noted in Figure 2 of the paper**

| Group | Number of files | GSEs                                                                                                                                   |
|-------|-----------------|----------------------------------------------------------------------------------------------------------------------------------------|
| A     | 47              | 2735, 3678, 4217, 4218, 5850, 6021, 6022, 7364, 7538, 9250, 9757, 9758, 9759, 9761, 9819, 9890, 10270                                  |
| B     | 68              | 2125, 4824, 5816, 6573, 6695, 6798, 6872, 6969, 7161, 7846, 8302, 8316, 8832, 8853, 9361, 9686, 9834, 9835, 10070, 10479, 10575, 10709 |

Apart from their unusual values groups A and B are also distinguished by the size of the 39 experiments involved: they average just 3 CEL files per experiment, compared to an average of 34 CEL files for the remaining 290 experiments considered (though that figure is inflated by the several thousand CEL files from GSE2109, a major cancer study).

### Full 10-platform version of Table 3

Entries are the mean parameter estimates for the 26 dummy variables forming part of a multiple regression model fitted to each of more than 28,000 CEL files. The units are standard deviations (sd) of logarithms of the raw data. Values of 0.25 sd or greater are shown in bold type.

| Parameter<br>Array | Human       |             |             | Mouse       | Arabidopsis | Barley      | Rice        | Soybean     | Drosophila  |             |
|--------------------|-------------|-------------|-------------|-------------|-------------|-------------|-------------|-------------|-------------|-------------|
|                    | U133A       | U133A.2     | U133+2      | 430.2       | ATH1        | Barley1     | Rice        | Soybean     | DrosG       | Dros.2      |
| CCCCC              | <b>0.56</b> | <b>0.41</b> | <b>0.55</b> | <b>0.56</b> | <b>0.32</b> | <b>0.37</b> | <b>0.57</b> | <b>1.01</b> | 0.10        | 0.24        |
| CCCCCCC            | <b>0.42</b> | <b>0.33</b> | <b>0.40</b> | <b>0.34</b> | <b>0.37</b> | <b>0.26</b> | <b>0.33</b> | <b>0.38</b> | <b>0.32</b> | <b>0.41</b> |
| CCGCCTCCC          | <b>0.33</b> | <b>0.25</b> | <b>0.46</b> | <b>0.42</b> | <b>0.34</b> | 0.17        | <b>0.30</b> | <b>0.43</b> | 0.18        | <b>0.30</b> |
| TCGCCGCT           | <b>0.25</b> | 0.19        | <b>0.25</b> | <b>0.28</b> | <b>0.27</b> | 0.22        | <b>0.25</b> | <b>0.33</b> | <b>0.36</b> | <b>0.26</b> |
| CCCCG              | <b>0.32</b> | 0.21        | <b>0.26</b> | 0.19        | <b>0.29</b> | <b>0.26</b> | <b>0.25</b> | 0.23        | 0.23        | <b>0.28</b> |
| GGGG               | <b>0.33</b> | 0.09        | <b>0.33</b> | <b>0.37</b> | -0.03       | 0.18        | 0.16        | <b>0.44</b> | 0.23        | 0.08        |
| (AT)CCGC           | 0.20        | 0.17        | 0.24        | 0.23        | 0.21        | 0.12        | 0.20        | <b>0.26</b> | 0.23        | <b>0.26</b> |
| GCCCG              | 0.15        | 0.14        | 0.10        | 0.17        | 0.19        | 0.18        | 0.20        | 0.14        | <b>0.40</b> | <b>0.31</b> |
| AGGCCA             | -0.21       | -0.17       | -0.20       | -0.18       | -0.17       | -0.10       | -0.11       | -0.18       | -0.14       | -0.13       |
| CCCCTC             | <b>0.30</b> | 0.20        | <b>0.28</b> | 0.21        | 0.10        | 0.07        | 0.16        | -0.04       | 0.08        |             |
| CTGCCT             | 0.20        | 0.15        | 0.19        | 0.20        | 0.12        | 0.13        | 0.16        | 0.17        | 0.15        | 0.12        |
| CTGGCC             | -0.15       | -0.11       | -0.16       | -0.15       | -0.18       | -0.14       | -0.14       | -0.18       | -0.08       | -0.13       |
| AACCC              | -0.19       | -0.12       | -0.16       | -0.19       | -0.09       | -0.09       | -0.14       | -0.07       | -0.21       | -0.10       |
| TCGCTC             | 0.14        | 0.08        | 0.12        | 0.13        | 0.19        | 0.13        | 0.15        | 0.09        | 0.17        | 0.11        |
| GGGGG              | 0.15        | 0.06        | 0.13        | 0.14        | -0.04       | 0.10        | 0.10        | -0.22       | 0.22        | 0.06        |
| ACGCCA             | 0.13        | 0.10        | 0.14        | 0.14        | 0.16        | 0.05        | 0.12        | 0.12        | 0.12        | 0.15        |
| NotAorT            | -0.15       | -0.14       | -0.14       | -0.12       | -0.17       | -0.06       | -0.10       | -0.10       | -0.14       | -0.07       |
| TCCCC              | 0.21        | 0.12        | 0.20        | 0.12        | 0.10        | 0.11        | 0.02        | 0.11        | -0.05       | 0.06        |
| TCCCT              | 0.20        | 0.14        | 0.20        | 0.20        | 0.07        | 0.05        | 0.04        | 0.12        | 0.04        | 0.05        |
| TGGGG              | -0.15       | -0.13       | -0.15       | -0.11       | -0.12       | -0.17       | -0.11       | -0.09       | -0.07       | 0.02        |
| GCTCCTCG           | 0.15        | 0.06        | 0.13        | 0.14        | 0.11        | 0.10        | 0.11        | 0.14        | 0.12        | 0.01        |
| GGTTGCC            | 0.12        | 0.09        | 0.08        | 0.09        | 0.10        | 0.07        | 0.08        | 0.13        | 0.17        | 0.06        |
| GAACCA             | -0.19       | -0.10       | -0.13       | -0.12       | -0.09       | -0.04       | -0.08       | -0.05       | -0.11       | -0.05       |
| GGTGCT             | 0.05        | 0.03        | 0.04        | 0.07        | 0.18        | 0.13        | 0.15        | 0.11        | 0.13        | 0.12        |
| GCCCTCCG           | 0.12        | 0.06        | 0.11        | 0.12        | 0.06        | 0.09        | 0.09        | 0.16        | 0.07        | 0.05        |
| GTGGTTC            | 0.06        | 0.06        | 0.06        | 0.07        | 0.15        | 0.06        | 0.10        | 0.17        | 0.10        | 0.06        |
| Median $R^2$       | 89%         | 88%         | 91%         | 91%         | 86%         | 91%         | 90%         | 90%         | 94%         | 79%         |
| No. of files       | 4753        | 2002        | 10000       | 1556        | 2288        | 1072        | 1356        | 3049        | 997         | 1186        |
| No. of GSEs        | 114         | 69          | 322         | 107         | 160         | 19          | 51          | 62          | 62          |             |

## GSEs with consistently high or low estimates for the dummy parameters

Let  $p_m(E)$  be the proportion of CEL files within experiment  $E$  for which  $\beta_m$  (for motif  $m$ ) is significant at the 0.01% level. Let  $M(p_m)$  be the median of the  $p_m(E)$  values across the various experiments. Let  $N_E$  be the number of CEL files in experiment  $E$ . The criterion for inclusion in the tables that follow is that  $N_E \times |p_m(E) - M(p_m)| \geq 10$ , which implies that at least 10 CEL files in experiment  $E$  had atypical values for  $\beta_m$ . Because of the criterion for inclusion, the experiments with the largest numbers of experiments are the most likely to appear in a table and those involving less than 10 experiments cannot appear. In calculating the median, however, each experiment is equally weighted. These tables should be regarded as indicative rather than definitive.

### HGU133A

| Experiment | Estimate relatively rarely important                         | Estimate relatively commonly important |
|------------|--------------------------------------------------------------|----------------------------------------|
| GSE473     | CCCCG                                                        | GGTTGCCC, ACGCCA, GAACCA, TCCCC        |
| GSE474     |                                                              | TCCC                                   |
| GSE1133    | (AT)CCGC, CCCCC                                              | GCCCTCCG, GAACCA, TCCCC                |
| GSE1159    | GCTCCTCG, GAACCA, TCCCC                                      | AGGCCA, ACGCCA, NotAorT                |
| GSE1295    |                                                              | TCGCTC, ACGCCA, TCCCC                  |
| GSE1297    | GAACCA                                                       | TCCCC                                  |
| GSE1420    | CCCCG                                                        | TCCCT                                  |
| GSE1456    | (AT)CCGC                                                     | AGGCCA, GAACCA                         |
| GSE1460    | (AT)CCGC, AGGCCA, GTCCTCG,<br>CCCCG, GAACCA                  | GGTTGCCC                               |
| GSE1462    | GTCCTCG                                                      |                                        |
| GSE1561    |                                                              | GGTTGCCC, GAACCA, TCCCC                |
| GSE1577    | (AT)CCGC, AGGCCA, CTGCCT,<br>GTCCTCG, CCCCC, CCCCC, GAACCA   |                                        |
| GSE1615    | GGGG                                                         |                                        |
| GSE1650    | (AT)CCGC, GGGG                                               | GCCCTCCG, TCCCC                        |
| GSE1722    | (AT)CCGC, GTCCTCG                                            | GGTTGCCC                               |
| GSE1729    |                                                              | ACGCCA                                 |
| GSE1786    | (AT)CCGC, CTGCCT, GTCCTCG, GAACCA                            | TCCCC                                  |
| GSE1869    |                                                              | TCCCC                                  |
| GSE1922    |                                                              | GGTTGCCC, ACGCCA                       |
| GSE1935    |                                                              | TCCCT, TCCCC                           |
| GSE2004    | (AT)CCGC                                                     |                                        |
| GSE2018    | GAACCA                                                       | ACGCCA                                 |
| GSE2044    |                                                              | TCCCC                                  |
| GSE2113    | (AT)CCGC                                                     | GCCCTCCG, GAACCA                       |
| GSE2189    |                                                              | GGTTGCCC, TCCCC                        |
| GSE2240    |                                                              | TCCCC                                  |
| GSE2280    | (AT)CCGC, GGGG                                               |                                        |
| GSE2328    | (AT)CCGC, GGGG, CCCCC                                        | GGTTGCCC, ACGCCA                       |
| GSE2351    | CCCCTC, CCCCC                                                | ACGCCA, TCCCC                          |
| GSE2361    | GGGG                                                         | GCCCTCCG, GAACCA, TCCCC                |
| GSE2443    | (AT)CCGC, CTGCCT, TCGCCGCT,<br>CCCCG, GAACCA                 | TCCCT, TCCCC                           |
| GSE2450    |                                                              | ACGCCA                                 |
| GSE2485    | (AT)CCGC, CTGCCT, TCGCCGCT,<br>GTCCTCG, CCCCC, CCCCC, GAACCA | TCCCT                                  |
| GSE2742    | GTCCTCG                                                      |                                        |
| GSE2990    | GTCCTCG, GGGG, TCCCC                                         | AGGCCA, ACGCCA                         |

| Experiment | Estimate relatively rarely important                                  | Estimate relatively commonly important          |
|------------|-----------------------------------------------------------------------|-------------------------------------------------|
| GSE3167    | (AT)CCGC, CCCCC                                                       | GGTTGCCC, TCCCT, TCCCC                          |
| GSE3218    | (AT)CCGC                                                              | ACGCCA                                          |
| GSE3284    | GGGG, (AT)CCGC, CCCCC                                                 |                                                 |
| GSE3307    |                                                                       | AGGCCA, GAACCA                                  |
| GSE3419    |                                                                       | ACGCCA, TCCCT, TCCCC                            |
| GSE3494    | GGTTGCCC, GAACCA, TCCCC                                               | (AT)CCGC, AGGCCA, GCTCCTCG, GGGGG<br>NotAorT    |
| GSE3524    | GAACCA                                                                | ACGCCA, TCCCC                                   |
| GSE3780    | (AT)CCGC                                                              |                                                 |
| GSE3790    | (AT)CCGC, GGTTGCCC                                                    | AGGCCA, GCTCCTCG, NotAorT, GAACCA<br>TCCCC      |
| GSE3823    | (AT)CCGC, AGGCCA, GCTCCTCG, CCCCC                                     | GGTTGCCC                                        |
| GSE3846    |                                                                       | GCCCTCCG, TCCCT                                 |
| GSE3860    | (AT)CCGC, GGTTGCCC                                                    |                                                 |
| GSE3910    | (AT)CCGC, CTGCCT, TCGCCGCT, CCCCC,<br>GAACCA, AGGCCA, GCTCCTCG        | TCCCT, TCCCC                                    |
| GSE3911    | CCCGCCCC, (AT)CCGC, CTGCCT, TCGCCGCT,<br>GCTCCTCG, CCCCC, GAACCA      | TCCCT, TCCCC                                    |
| GSE3912    | (AT)CCGC, CTGCCT, TCGCCGCT, CCCCC,<br>GAACCA, CCCCC, AGGCCA, GCTCCTCG | TCCCT, TCCCC                                    |
| GSE4045    |                                                                       | GAACCA, TCCCC                                   |
| GSE4127    | GCTCCTCG                                                              | GGTTGCCC                                        |
| GSE4271    | GGGG                                                                  | GGTTGCCC, GAACCA, TCCCC                         |
| GSE4475    | (AT)CCGC, GGTTGCCC, GGGG, TCCCC                                       | AGGCCA, GGTTGCCC, NotAorT, GAACCA               |
| GSE4636    | GAACCA                                                                |                                                 |
| GSE4698    |                                                                       | GCCCTCCG, GGTTGCCC, GAACCA                      |
| GSE4824    | (AT)CCGC, GGTTGCCC, GGGG, GAACCA                                      | GGTTGCCC                                        |
| GSE4917    | CCCCG                                                                 | CTGGCC, GCCCTCCG, ACGCCA, TCCCT<br>GGGGG, TCCCC |
| GSE4922    | GGTTGCCC, GAACCA, TCCCC                                               | (AT)CCGC, AGGCCA, GCTCCTCG, GGGGG<br>NotAorT    |
| GSE5258    | (AT)CCGC, GGTTGCCC, GGGG, TCCCC                                       | AGGCCA, GCTCCTCG, NotAorT, GAACCA               |

There are 60 experiments listed in the table above. There were 18 other experiments that contained at least 10 CEL files. These were: GSE1000 (10 CEL files), GSE1140 (14), GSE1318 (10), GSE1364 (21), GSE1455 (18), GSE1648 (11), GSE1937 (12), GSE2060 (12), GSE2152 (22), GSE2225 (18), GSE2395 (20), GSE2487 (10), GSE3183 (15), GSE3585 (12), GSE3772 (10), GSE4646 (23), GSE4885 (12), and GSE5090 (17).

The following experiments contained between 100 and 350 CEL files: GSE1133, GSE1159, GSE1456, GSE2351, GSE2990, GSE3218, GSE3307, GSE3494, GSE3790, GSE3846, GSE3912, GSE4271, GSE4475, GSE4922 and GSE5258.

## HGUI33A\_2

| Experiment | Estimate relatively rarely important                                                    | Estimate relatively commonly important                    |
|------------|-----------------------------------------------------------------------------------------|-----------------------------------------------------------|
| GSE10040   | GGGG                                                                                    | ACGCCA                                                    |
| GSE10087   |                                                                                         | GGTTGCCC, GCTCCTCG                                        |
| GSE10174   | CCGCCTCCC, CCCCTC, CCCGCCCC,<br>AGGCCA, CTGCCT, TCGCCGCT, GGGG,<br>CCCC, CCCC, (AT)CCGC | TCCCC                                                     |
| GSE10240   | (AT)CCGC                                                                                | GGTTGCCC                                                  |
| GSE10474   | (AT)CCGC, GGGG                                                                          | GCCCTCCG, GCTCCTCG                                        |
| GSE10797   | CCGCCTCCC, CCCCTC, CCCGCCCC,<br>AGGCCA, CTGCCT, TCGCCGCT, GGGG,<br>CCCC, CCCC, (AT)CCGC | GGGGG                                                     |
| GSE10804   |                                                                                         | GGTTGCCC                                                  |
| GSE10841   | GGGG, CCCC                                                                              | CTGGCC, GGTTGCCC, GCTCCTCG, TCCCT                         |
| GSE10911   |                                                                                         | GGGGG                                                     |
| GSE11011   | CCCCG                                                                                   | GGTTGCCC                                                  |
| GSE11630   | GGGG                                                                                    |                                                           |
| GSE11792   | GGGG                                                                                    |                                                           |
| GSE11889   | AGGCCA, NotAorT, CCCC                                                                   | GCCCTCCG, GCTCCTCG,<br>ACGCCA, TCCCT, GGGG, TCCCC         |
| GSE11903   | GGGG                                                                                    | GCCCTCCG, GGTTGCCC, GCTCCTCG,<br>ACGCCA                   |
| GSE11904   | CCGCCTCCC, CCCCTC, (AT)CCGC, AGGCCA,<br>CTGCCT, TCGCCGCT, GGGG, CCCCC, CCCC             |                                                           |
| GSE12109   | GGGG                                                                                    |                                                           |
| GSE12211   | (AT)CCGC                                                                                | GGTTGCCC                                                  |
| GSE12438   | (AT)CCGC, GGGG                                                                          | GGTTGCCC                                                  |
| GSE12626   | CCGCCTCCC, CCCCTC, (AT)CCGC, AGGCCA<br>GGGG, CCCC                                       | GGTTGCCC, AGGCCA, NotAorT                                 |
| GSE12666   | GGGG                                                                                    |                                                           |
| GSE12682   | CCCCG                                                                                   | CTGGCC, GCCCTCCG, GCTCCTCG, AGCCA<br>TCCCT, GGGG, TCCCC   |
| GSE12868   | CCCCG                                                                                   | CTGGCC, GCCCTCCG, GCTCCTCG,<br>ACGCCA, TCCCT, GGGG, TCCCC |
| GSE13009   |                                                                                         | ACGCCA, TCCCC                                             |
| GSE13162   |                                                                                         | TCCCC, CTGGCC                                             |
| GSE13267   |                                                                                         | CTGGCC, AGGCCA, TCCCC                                     |
| GSE13996   | GGGG, CCCC                                                                              | ACGCCA                                                    |
| GSE14034   | (AT)CCGC, GGGG                                                                          | GCCCC, GGTTGCCC                                           |
| GSE14098   | CTGCCT                                                                                  |                                                           |
| GSE14107   | (AT)CCGC, GGGG                                                                          | GGTTGCCC, GCCCC                                           |
| GSE14210   | (AT)CCGC, GGGG, CCCC                                                                    | TCCCC, CTGGCC, GCTCCTCG, AGCCA<br>TCCCT, GGGG, NotAorT    |
| GSE14317   |                                                                                         | GCTCCTCG, GGTTGCCC, AGCCA                                 |
| GSE14323   | GGGG, CCCC                                                                              | CTGGCC, TCCCC, GCCCTCCG, GCTCCTCG<br>ACGCCA, TCCCT        |
| GSE14330   |                                                                                         | GGTTGCCC                                                  |
| GSE14520   |                                                                                         | TCCCC                                                     |

GSE12626 contained 465 CEL files and relates to a “*Genetic analysis of radiation-induced changes in human gene expression.*” Two other GSEs (14210 and 14323 contain between 100 and 20 CEL files). Apart from the 35 experiments given above, the following experiments also contained at least 10 CEL files:

GSE10433 (12 CEL files), GSE10935 (12), GSE12100 (12), GSE13046 (16), GSE13577 (20), GSE14256 (10), GSE14325 (10), GSE14335 (10), and GSE1419 (16).



## HG133Plus2

| Experiment | Estimate relatively rarely important                                                                  | Estimate relatively commonly important |
|------------|-------------------------------------------------------------------------------------------------------|----------------------------------------|
| GSE2125    | (AT)CCGC, CTGCCT, ACGCCA, GGGG, CCCCC                                                                 | TCCCT                                  |
| GSE2634    | CCCCTC, AGGCCA, GGGG, CCCCC, CCCCC                                                                    | GGTGCT                                 |
| GSE2677    | TCCCC                                                                                                 |                                        |
| GSE2817    |                                                                                                       | GGGGG                                  |
| GSE2842    | TCCCC                                                                                                 |                                        |
| GSE3062    |                                                                                                       | GGTTGCCC                               |
| GSE3077    |                                                                                                       | GCCCTCCG, TCCCT                        |
| GSE3284    | TCCCC                                                                                                 |                                        |
| GSE3325    |                                                                                                       | TCCCT, GGGGG                           |
| GSE3678    | CCGCCTCCC, CCCCTC, CCCGCCCC, (AT)CCGC, AGGCCA, CTGCCT, TCGCCGCT, GTCCTCG, ACGCCA, CCCCC, CCCCC, TCCCC |                                        |
| GSE3744    |                                                                                                       | CTGGCC, TCCCT                          |
| GSE4036    | GTCCTCG, TCCCC                                                                                        |                                        |
| GSE4183    |                                                                                                       | CTGGCC                                 |
| GSE4217    | CCGCCTCCC, CCCCTC, CCCGCCCC, (AT)CCGC, AGGCCA, CTGCCT, TCGCCGCT, GTCCTCG, ACGCCA, CCCCC, CCCCC, TCCCC |                                        |
| GSE4218    | CCGCCTCCC, CCCCTC, CCCGCCCC, (AT)CCGC, AGGCCA, CTGCCT, TCGCCGCT, GTCCTCG, ACGCCA, CCCCC, CCCCC, TCCCC | GTGGTTC                                |
| GSE4237    | ACGCCA                                                                                                | CTGGCC, TCCCT                          |
| GSE4488    | ACGCCA                                                                                                | GCCCTCCG, GAACCA                       |
| GSE4600    |                                                                                                       | CTGGCC, TCGCTC, GCCCTCCG, TCCCT        |
| GSE4773    | GGGG, TCCCC                                                                                           | GCCCTCCG, GGTTGCCC                     |
| GSE4780    |                                                                                                       | CTGGCC                                 |
| GSE4984    | GTCCTCG                                                                                               |                                        |
| GSE5040    | GTCCTCG, TCCCC                                                                                        |                                        |
| GSE5110    | GTCCTCG, ACGCCA                                                                                       |                                        |
| GSE5116    | CCCCG                                                                                                 |                                        |
| GSE5264    |                                                                                                       | GCCCTCCG, TCCCT                        |
| GSE5281    |                                                                                                       | CTGGCC, GGGGG, TGGGG                   |
| GSE5460    |                                                                                                       | CTGGCC, TCCCT                          |
| GSE5547    | CCCCG                                                                                                 | TCCCT                                  |
| GSE5563    | GTCCTCG                                                                                               | GGGGG                                  |
| GSE5679    | ACGCCA                                                                                                | GCCCTCCG                               |
| GSE5787    | GTCCTCG                                                                                               |                                        |
| GSE5790    | GGGG, CCCCC                                                                                           |                                        |
| GSE5809    | ACGCCA                                                                                                |                                        |
| GSE5816    | (AT)CCGC, ACGCCA, GGGG                                                                                | GGTTGCCC                               |
| GSE5823    |                                                                                                       | CTGGCC, GGGGG                          |
| GSE5850    | CCGCCTCCC, CCCCTC, CCCGCCCC, (AT)CCGC, AGGCCA, CTGCCT, TCGCCGCT, GTCCTCG, ACGCCA, CCCCC, CCCCC, TCCCC |                                        |
| GSE5968    |                                                                                                       | CTGGCC, GCCCTCCG, TCCCT                |

| Experiment | Estimate relatively rarely important                                                 | Estimate relatively commonly important |
|------------|--------------------------------------------------------------------------------------|----------------------------------------|
| GSE6004    | CCCCG                                                                                | CTGGCC, GCCCTCCG, TCCCT                |
| GSE6013    |                                                                                      | GGTTGCCC                               |
| GSE6034    | TCCCC                                                                                |                                        |
| GSE6207    | (AT)CCGC, ACGCCA                                                                     | GGTTGCCC, TCCCT                        |
| GSE6338    |                                                                                      | CTGGCC                                 |
| GSE6351    | ACGCCA                                                                               | GCCCTCCG, GAACCA                       |
| GSE6519    | CCCCG                                                                                | CTGGCC, TCCCT                          |
| GSE6565    | GCTCCTCG                                                                             |                                        |
| GSE6575    |                                                                                      | GAACCA                                 |
| GSE6728    | GGGG                                                                                 |                                        |
| GSE6791    |                                                                                      | GAACCA                                 |
| GSE6798    | (AT)CCGC, CTGCCT, GCTCCTCG, ACGCCA                                                   |                                        |
| GSE6872    | (AT)CCGC, TCGCCGCT, ACGCCA, CCCCC                                                    |                                        |
| GSE6960    | GCTCCTCG, TCCCC                                                                      |                                        |
| GSE6962    | GCTCCTCG                                                                             |                                        |
| GSE6969    | (AT)CCGC, TCGCCGCT, ACGCCA, v                                                        |                                        |
| GSE6972    | GCTCCTCG                                                                             |                                        |
| GSE7011    |                                                                                      | TCCCT                                  |
| GSE7023    |                                                                                      | CTGGCC, TCCCT                          |
| GSE7116    |                                                                                      | GCCCTCCG, GGGGG                        |
| GSE7158    |                                                                                      | CTGGCC, TCGCTC, GCCCTCCG               |
| GSE7161    | (AT)CCGC, ACGCCA                                                                     |                                        |
| GSE7216    | (AT)CCGC, ACGCCA                                                                     | GCCCTCCG                               |
| GSE7224    |                                                                                      | TCCCT                                  |
| GSE7247    |                                                                                      | CTGGCC, TCGCTC, GCCCTCCG               |
| GSE7305    | GCTCCTCG, TCCCC                                                                      |                                        |
| GSE7392    |                                                                                      | CTGGCC, TCCCT                          |
| GSE7400    |                                                                                      | GGGGG, TCCCC                           |
| GSE7440    | (AT)CCGC, CTGCCT, TCGCCGCT, ACGCCA                                                   | TCCCT                                  |
| GSE7451    | CCCCTC, CCCGCC, (AT)CCGC, AGGCCA, CTGCCT, TCGCCGCT, GCTCCTCG, ACGCCA, NotAorT, CCCCC |                                        |
| GSE7462    |                                                                                      | GCCCTCCG, TCCCT                        |
| GSE7476    |                                                                                      | CTGGCC, GGGGG                          |
| GSE7486    | TCCCC                                                                                |                                        |
| GSE7500    | GCTCCTCG                                                                             | CTGGCC                                 |

| Experiment | Estimate relatively rarely important                                                                   | Estimate relatively commonly important |
|------------|--------------------------------------------------------------------------------------------------------|----------------------------------------|
| GSE7509    |                                                                                                        | TCCCT                                  |
| GSE7538    | CCGCCTCCC, CCCCTC, CCCGCCCC, (AT)CCGC, AGGCCA, CTGCCT, TCGCCGCT, GTCCTCG, ACGCCA, CCCCC, CCCCCG, TCCCC | GTGGTTC<br>GCCCTCCG                    |
| GSE7553    |                                                                                                        |                                        |
| GSE7562    | GTCCTCG                                                                                                |                                        |
| GSE7568    | ACGCCA                                                                                                 |                                        |
| GSE7578    | ACGCCA                                                                                                 | CTGGCC                                 |
| GSE7835    | GGGG                                                                                                   | AACCC                                  |
| GSE7846    | (AT)CCGC, GTCCTCG, ACGCCA                                                                              |                                        |
| GSE7874    | TCCCC                                                                                                  | GAACCA                                 |
| GSE7879    |                                                                                                        | GCCCTCCG, TCCCT, AACCC                 |
| GSE7888    |                                                                                                        | CTGGCC, TCGCTC, GCCCTCCG, TCCCT, AACCC |
| GSE7890    |                                                                                                        | CTGGCC, GGTTGCC                        |
| GSE7904    |                                                                                                        | CTGGCC, TCCCT                          |
| GSE8023    |                                                                                                        | TCCCT                                  |
| GSE8049    | ACGCCA                                                                                                 |                                        |
| GSE8066    | GTCCTCG                                                                                                |                                        |
| GSE8121    |                                                                                                        | GCCCTCCG, TCCCT                        |
| GSE8192    | GTCCTCG, TCCCC                                                                                         |                                        |
| GSE8332    | GGGG                                                                                                   |                                        |
| GSE8507    |                                                                                                        | GCCCTCCG                               |
| GSE8514    | GGGG                                                                                                   | GAACCA                                 |
| GSE8565    | GTCCTCG, GGGG                                                                                          |                                        |
| GSE8586    |                                                                                                        | GCCCTCCG                               |
| GSE8597    | GTCCTCG                                                                                                |                                        |
| GSE8646    | GGGG                                                                                                   | GCCCTCCG, TCCCT                        |
| GSE8665    |                                                                                                        | GAACCA                                 |
| GSE8668    |                                                                                                        | GCCCTCCG                               |
| GSE8671    |                                                                                                        | CTGGCC                                 |
| GSE8685    | TCCCC                                                                                                  |                                        |
| GSE8687    | ACGCCA, GGGG                                                                                           |                                        |
| GSE8717    |                                                                                                        | GGGGG, TGGGG                           |
| GSE8742    | GTCCTCG, TCCCC                                                                                         |                                        |
| GSE8961    |                                                                                                        | CTGGCC, GCCCTCCG, TCCCT                |

| Experiment | Estimate relatively rarely important                                                                            | Estimate relatively commonly important |
|------------|-----------------------------------------------------------------------------------------------------------------|----------------------------------------|
| GSE9101    |                                                                                                                 | GCCCTCCG, AACCC                        |
| GSE9103    |                                                                                                                 | GCCCTCCG, GAACCA                       |
| GSE9150    | TCCCC                                                                                                           |                                        |
| GSE9171    |                                                                                                                 | GCCCTCCG, TCCCT, GGGGG                 |
| GSE9200    |                                                                                                                 | GCCCTCCG, TCCCT, GGGGG                 |
| GSE9250    | CCGCCTCCC, CCCCTC, (AT)CCGC, AGGCCA, CTGCCT, TCGCCGCT, GTCCTCG, ACGCCA, GGGG, CCCCC, CCCCCG, TCCCC              |                                        |
| GSE9254    |                                                                                                                 | TCGCTC                                 |
| GSE9438    |                                                                                                                 | TCCCT                                  |
| GSE9526    |                                                                                                                 | CTGGCC, GCCCTCCG, TCCCT                |
| GSE9599    |                                                                                                                 | GAACCA                                 |
| GSE9647    | GGGG                                                                                                            | GCCCC                                  |
| GSE9686    | (AT)CCGC, GTCCTCG, ACGCCA                                                                                       | GGTTGCCC                               |
| GSE9692    |                                                                                                                 | GCCCTCCG, TCCCT, GAACCA                |
| GSE9709    | ACGCCA, GGGG                                                                                                    | AACCC                                  |
| GSE9757    | CCGCCTCCC, CCCCTC, CCCGCCCC, (AT)CCGC, AGGCCA, CTGCCT, TCGCCGCT, GTCCTCG, ACGCCA, NotAorT, CCCCC, CCCCCG, TCCCC |                                        |
| GSE9758    | CCGCCTCCC, CCCCTC, CCCGCCCC, (AT)CCGC, AGGCCA, CTGCCT, TCGCCGCT, GTCCTCG, ACGCCA, NotAorT, CCCCC, CCCCCG, TCCCC |                                        |
| GSE9759    | CCGCCTCCC, CCCCTC, CCCGCCCC, (AT)CCGC, AGGCCA, CTGCCT, TCGCCGCT, GTCCTCG, ACGCCA, NotAorT, CCCCC, CCCCCG, TCCCC |                                        |
| GSE9761    | CCGCCTCCC, CCCCTC, CCCGCCCC, (AT)CCGC, AGGCCA, CTGCCT, TCGCCGCT, GTCCTCG, ACGCCA, NotAorT, CCCCC, CCCCCG, TCCCC |                                        |
| GSE9768    | GTCCTCG, TCCCC                                                                                                  |                                        |
| GSE9819    | (AT)CCGC, AGGCCA, CTGCCT, GTCCTCG, ACGCCA                                                                       |                                        |
| GSE9826    | TCCCC                                                                                                           |                                        |
| GSE9844    | CCCGCCCC, (AT)CCGC, AGGCCA, CTGCCT, TCGCCGCT, GTCCTCG, ACGCCA, NotAorT, CCCCCG                                  | TCCCT                                  |
| GSE9890    | CCGCCTCCC, CCCCTC, CCCGCCCC, (AT)CCGC, AGGCCA, CTGCCT, TCGCCGCT, GTCCTCG, ACGCCA, GGGG, CCCCC, CCCCCG, TCCCC    |                                        |
| GSE9894    | GGGG                                                                                                            |                                        |

| Experiment | Estimate relatively rarely important                                                                 | Estimate relatively commonly important |
|------------|------------------------------------------------------------------------------------------------------|----------------------------------------|
| GSE10070   | (AT)CCGC, GCTCCTCG, ACGCCA, TCCCC                                                                    | GGTTGCC                                |
| GSE10270   | CCGCCTCCC, CCCCTC, CCCGCC, (AT)CCGC, ACGCCA, CTGCCT, TCGCCGCT, GTCCTCG, ACGCCA, CCCCC, CCCCCG, TCCCC | GGGGG<br>TCGCTC, GCCCTCCG, TCCCT       |
| GSE10311   |                                                                                                      | CTGGCC, TCGCTC, TCCCT                  |
| GSE10315   | GGGG                                                                                                 |                                        |
| GSE10406   |                                                                                                      |                                        |
| GSE10410   | TCCCC                                                                                                |                                        |
| GSE10575   | (AT)CCGC, ACGCCA, GGGG, TCCCC                                                                        |                                        |
| GSE10609   |                                                                                                      | CTGGCC, TCCCT                          |
| GSE10700   | GGGG, TCCCC                                                                                          |                                        |
| GSE10709   | (AT)CCGC, ACGCCA                                                                                     | GTGGTTC                                |
| GSE11510   | GGGG                                                                                                 | TCCCT                                  |
| GSE11524   | (AT)CCGC, CTGCCT, TCGCCGCT, ACGCCA                                                                   | TCCCT                                  |
| GSE11550   |                                                                                                      | CTGGCC                                 |
| GSE11552   |                                                                                                      | CTGGCC                                 |

There were 198 experiments for which there were data for 10 or more CEL files. Of the 198, 141 appeared in the table above. These included GSE5460 (127 CEL files), GSE8332 (184 CEL files) and GSE8507 (141 CEL files). Most of the large experiments are included amongst the remaining 57 GSEs (with 10 or more CEL files) that were examined and were not judged to have unusual characteristics were numbers:

2109, 3202, 3526, 4888, 5350, 5372, 3062, 4107, 4498, 5058, 5060, 5081, 5675, 5764, 6054, 6088, 6269, 6281, 6364,

6532, 6764, 6885, 7127, 7152, 7153, 7268, 7307, 7434, 7586, 7621, 7967, 8052, 8527, 8581, 8596, 8658, 8702, 8762,

8977, 9086, 9089, 9090, 9091, 9195, 9196, 9264, 9452, 9517, 9762, 9770, 9832, 9865, 9891, 9899, 10358, 10586, 11525

## Mouse430\_2

| Experiment | Estimate relatively rarely important                                                            | Estimate relatively commonly important |
|------------|-------------------------------------------------------------------------------------------------|----------------------------------------|
| GSE1074    | AGGCCA, CTGGCC                                                                                  | GCCCTCCG, GGGGG, AACCC                 |
| GSE1435    | CCGCCTCCC, CCCCTC, AGGCCA, CTGCCT,<br>GCTCCTCG, CCCCC                                           |                                        |
| GSE1479    | ACGCCA                                                                                          |                                        |
| GSE1871    |                                                                                                 | GCCCTCCG                               |
| GSE1999    | CTGGCC                                                                                          |                                        |
| GSE2019    | CCGCCTCCC, CCCCTC, (AT)CCGC, AGGCCA,<br>CTGCCT, CTGGCC, GCTCCTCG, ACGCCA, TCCCT,<br>GGGG, CCCCC |                                        |
| GSE3100    | TCCCT                                                                                           |                                        |
| GSE3203    | (AT)CCGC, CTGGCC, ACGCCA                                                                        | GGTTGCCC, TCCCC                        |
| GSE3414    | ACGCCA                                                                                          | GCCCTCCG                               |
| GSE3440    | CTGGCC, TCCCT                                                                                   | GAACCA, AACCC                          |
| GSE3463    | (AT)CCGC, CTGCCT, CTGGCC, ACGCCA, TCCCT                                                         |                                        |
| GSE3653    | AGGCCA, CTGGCC, GTCCTCG, TCCCT                                                                  | GGGGG, GCCCG                           |
| GSE3822    | (AT)CCGC, CTGGCC, ACGCCA                                                                        |                                        |
| GSE4034    | CTGGCC, ACGCCA, TCCCT                                                                           | CCCCG                                  |
| GSE4035    |                                                                                                 | CCCCG                                  |
| GSE4051    | CCGCCTCCC, CCCCTC, (AT)CCGC, AGGCCA,<br>CTGCCT, CTGGCC, GCTCCTCG, ACGCCA,<br>TCCCT, CCCCC       | GGGGG, CCCCC                           |
| GSE4098    | CCCGCCCC, (AT)CCGC, AGGCCA, CTGCCT, CTGGCC,<br>TCGCCGCT, GTCCTCG, ACGCCA, NotAorT               | TCCCC                                  |
| GSE4189    |                                                                                                 | GCCCTCCG                               |
| GSE4307    | AGGCCA, CTGGCC, GTCCTCG                                                                         | AACCC, GCCCG                           |
| GSE4308    | CTGGCC, GTCCTCG                                                                                 | GCCCG                                  |
| GSE4309    | AGGCCA, CTGGCC, GTCCTCG                                                                         | AACCC, GCCCG                           |
| GSE4411    | CTGGCC, GTCCTCG, TCCCT                                                                          |                                        |
| GSE4481    |                                                                                                 | GCCCTCCG, TCCCC                        |
| GSE4758    | ACGCCA                                                                                          | GGGGG, CCCCC                           |
| GSE4774    | CTGGCC, GTCCTCG, TCCCT                                                                          | GCCCG                                  |

| Experiment | Estimate relatively rarely important                              | Estimate relatively commonly important |
|------------|-------------------------------------------------------------------|----------------------------------------|
| GSE5035    | CTGGCC, ACGCCA, TCCCT                                             | CCCCG                                  |
| GSE5037    | CCGCCTCCC, (AT)CCGC, CTGCCT, CTGGCC, GCTCCTCG, ACGCCA             | CCCCG                                  |
| GSE5128    | GCTCCTCG                                                          | GGTTGCCC, ACGCCA, TCCCT, GAACCA, GCCCG |
| GSE5198    |                                                                   | GCCCTCCG                               |
| GSE5202    |                                                                   | GGGGG, TCCCC                           |
| GSE5245    | (AT)CCGC, CTGCCT, CTGGCC, ACGCCA                                  | TCGCTC, GGGGG                          |
| GSE5296    | TCCCT                                                             | TCGCTC, CCCCC, GCCCG                   |
| GSE5324    | AGGCCA, TCCCT                                                     | GGGGG                                  |
| GSE5500    | GCTCCTCG, TCCCT                                                   | TCGCTC, GCCCTCCG                       |
| GSE6065    |                                                                   |                                        |
| GSE6210    | CTGGCC, ACGCCA                                                    | GGTTGCCC, GCCCG                        |
| GSE6223    | CCGCCTCCC, (AT)CCGC, CTGCCT, TCGCCGCT, GCTCCTCG, ACGCCA, TCCCT    | GGTTGCCC, GCCCG                        |
| GSE6290    | (AT)CCGC, ACGCCA                                                  | GCCCTCCG                               |
| GSE6397    |                                                                   | GCCCTCCG, GGTTGCCC                     |
| GSE6398    |                                                                   | GCCCTCCG                               |
| GSE6399    |                                                                   | TCGCTC, GCCCTCCG                       |
| GSE6514    |                                                                   | GGTTGCCC, GCCCG                        |
| GSE6589    | (AT)CCGC, ACGCCA                                                  | GCCCTCCG, GGTTGCCC, CCCCC              |
| GSE6595    | ACGCCA                                                            |                                        |
| GSE6623    | CCGCCTCCC, CCCCTC, (AT)CCGC, AGGCCA, CTGGCC, ACGCCA, TCCCT, CCCCC |                                        |
| GSE6881    | CTGGCC, TCCCT                                                     | TCGCTC, CCCCC, GCCCG                   |
| GSE6882    | TCCCT                                                             | TCGCTC, CCCCC, GCCCG                   |
| GSE6916    | TCCCT                                                             | TCGCTC, CCCCC, GCCCG                   |
| GSE6959    | ACGCCA                                                            | TCCCC                                  |

## Arabidopsis ATH1-12501

| Experiment | Estimate relatively rarely important                        | Estimate relatively commonly important    |
|------------|-------------------------------------------------------------|-------------------------------------------|
| GSE431     |                                                             | GGGG                                      |
| GSE630     | ATCCGC, CCCCC, GTCCTCG, CCCCC<br>ACGCCA, GGGG               |                                           |
| GSE680     | ATCCGC, ACGCCA, CCCCC, CCCCCG                               | AGGCCA, GCCCTCCG, GGGGG                   |
| GSE911     | CCCCC                                                       |                                           |
| GSE1051    | CCCCG                                                       |                                           |
| GSE1491    | ATCCGC, ACGCCA, CCCCC, CCCCCG                               |                                           |
| GSE2169    | ATCCGC, TCGCTC, CCCCC, CCCCCG                               | GGGG                                      |
| GSE2473    | CCGCCTCC, ATCCGC, ACGCCA,<br>CCCCC, CCCCCG, TCGCTC, GTCCTCG | AGGCA                                     |
| GSE3326    | ATCCGC, CCCCC                                               |                                           |
| GSE3350    |                                                             | AGGCCA, CTGGCC, GGTTGCC, GGGG             |
| GSE3416    | CCCCC                                                       |                                           |
| GSE4733    | ACGCCA                                                      | AGGCCA, CTGGCC                            |
| GSE4847    | CCCCC                                                       |                                           |
| GSE5520    | ATCCGC, ACGCCA, CCCCC, CCCCCG                               | GGTTGCC                                   |
| GSE5525    |                                                             | GTCCTCG                                   |
| GSE5530    |                                                             | AGGCCA                                    |
| GSE5533    | GGTGCT, GTGGTTC, CCCCCG                                     |                                           |
| GSE5612    |                                                             | AGGCCA, GTCCTCG                           |
| GSE5613    |                                                             | CCCCTC, AGGCCA, CTGGCC, GTCCTCG           |
| GSE5615    |                                                             | CCCCTC, GGGG                              |
| GSE5616    |                                                             | GGGG                                      |
| GSE5617    | GGTGCT                                                      | AGGCCA, CTGGCC, GTCCTCG, CTGCCT<br>ACGCCA |
| GSE5620    | ACGCCA, CCCCC, ATCCGC, GTCCTCG<br>CCCCG                     | GGTTGCC                                   |
| GSE5621    | CCCCC, ACGCCA, CCCCCG                                       |                                           |
| GSE5622    | TCGCTC, ACGCCA, CCCCCG                                      | GGGG, GGTTGCC                             |
| GSE5623    | ATCCGC, TCGCTC, ACGCCA, CCCCC<br>CCCCG                      | GGTTGCC, GGGG                             |
| GSE5624    | ATCCGC, TCGCTC, ACGCCA, CCCCC<br>CCCCG                      | GGGG                                      |
| GSE5625    | ATCCGC, ACGCCA, CCCCC, CCCCCG                               | GGGG                                      |
| GSE5626    | ATCCGC, TCGCTC, ACGCCA, CCCCC<br>CCCCG                      | GGGG                                      |
| GSE5627    | ATCCGC, ACGCCA, CCCCC, CCCCCG                               | GGTTGCC                                   |
| GSE5628    | ATCCGC, ACGCCA, CCCCC, CCCCCG                               |                                           |
| GSE5629    |                                                             | AGGCCA                                    |



| Experiment | Estimate relatively rarely important                                   | Estimate relatively commonly important                       |
|------------|------------------------------------------------------------------------|--------------------------------------------------------------|
| GSE5630    | GCTCCTCG, ACGCCA, CCCCC                                                |                                                              |
| GSE5631    | ATCCGC, CCCCC, CCCCCG                                                  | GGTTGCCC, CTGGCC                                             |
| GSE5632    | GCTCCTCG, ACGCCA, GGGG, CCCCCG                                         | AGGCCA, CTGGCC, GGTTGCCC                                     |
| GSE5633    | GCTCCTCG, ACGCCA, GGGG, CCCCCG                                         |                                                              |
| GSE5634    | GGTGCT, CCCCC                                                          | AGGCCA, CTGGCC                                               |
| GSE5636    |                                                                        | AGGCCA, GTCCTCG, CTGGCC, ACGCCA                              |
| GSE5637    |                                                                        | AGGCCA, GTCCTCG, CTGGCC, ACGCCA                              |
| GSE5638    |                                                                        | AGGCCA, GTCCTCG, CTGGCC, ACGCCA                              |
| GSE5685    | GGTGCT, GTGGTTC, CCCCC                                                 | CTGCCT, GTCCTCG, ACGCCA, GGGG                                |
| GSE5686    | GTCCTCG, CCCCC                                                         |                                                              |
| GSE5688    | ATCCGC, ACGCCA, CCCCC, CCCCCG                                          | GGTTGCCC, CTGGCC                                             |
| GSE5696    | GTGGTTC                                                                | AGGCCA, CTGGCC, GTCCTCG                                      |
| GSE5701    | ATCCGC, CCCCC                                                          | CTGGCC, GGTTGCCC                                             |
| GSE5728    | GGTGCT                                                                 |                                                              |
| GSE5730    | CCCGCCCC, ATCCGC, TCGCCGCT, TCGCTC,<br>NotAorT, CCCCC, ACGCCA, CCCCCG  |                                                              |
| GSE5738    | GTGGTTC                                                                | TCCCC<br>CCCCTC, CTGCCT, CTGGCC, GGTTGCGG<br>ACGCCA, GTCCTCG |
| GSE5746    | ATCCGC, ACGCCA, CCCCCG                                                 |                                                              |
| GSE5748    | ATCCGC, TCGCTC, CCCCCG                                                 |                                                              |
| GSE5749    | ATCCGC, GTGGTTC, CCCCC, CCCCCG                                         | AGGCCA, CTGCCT, CTGGCC, GGTTGCCC,<br>GGGG                    |
| GSE5751    | CCCCG                                                                  | CCCCTC, CTGCCT                                               |
| GSE5756    |                                                                        | GGGG                                                         |
| GSE5757    |                                                                        | GGGG                                                         |
| GSE5758    |                                                                        | GGGG                                                         |
| GSE6150    |                                                                        | CTGGCC                                                       |
| GSE6151    | TCGCTC, CCCCCG                                                         | AGGCCA, CTGCCT, CTGGCC, GGTTGCCC<br>ACGCCA                   |
| GSE6160    | ATCCGC                                                                 | CTGGCC                                                       |
| GSE6161    |                                                                        | AGGCCA, CTGCCT, CTGGCC                                       |
| GSE6174    | CCCCC                                                                  |                                                              |
| GSE6176    | CCCCC, GTGGTTC, CCCCCG                                                 | GTCCTCG                                                      |
| GSE6179    |                                                                        | CTGCCT                                                       |
| GSE6203    | CCGCCTCCC, ATCCGC, TCGCCGCT, GGTGCT,<br>TCGCTC, GTGGTTC, CCCCC, CCCCCG |                                                              |
| GSE6556    |                                                                        | GGGG                                                         |
| GSE6825    |                                                                        | CCCCTC                                                       |
| GSE6828    |                                                                        | AGGCCA, GTCCTCG<br>CCCCTC, CTGCCT                            |

There are 66 experiments listed above. There were a further 18 experiments that contain 10 or more CEL files. These are GSE631 (12 files), GSE2848 (12), GSE3056 (10), GSE5522 (12), GSE5684 (12), GSE5698 (12), GSE5737 (12), GSE5745 (12), GSE5752 (17), GSE5753 (16), GSE5754 (17), GSE5755 (17), GSE5770 (12), GSE6158 (12), GSE6169 (10), GSE6177 (26), GSE6826 (12) and GSE6832 (12). The two largest experiments were GSE5632 (66 CEL files) and GSE5630 (60).

## Rice

| Experiment | Estimate relatively rarely important                                               | Estimate relatively commonly important                    |
|------------|------------------------------------------------------------------------------------|-----------------------------------------------------------|
| GSE4471    |                                                                                    | GGGGG                                                     |
| GSE6737    |                                                                                    | CTGGCC, GCCCTCCG, TCGCTC                                  |
| GSE6893    | GCTCCTCG                                                                           | CTGGCC, GGTGCT, GCCCG                                     |
| GSE6901    |                                                                                    | GCCCG                                                     |
| GSE10373   | GGGG                                                                               | TCGCTC                                                    |
| GSE10857   | GCTCCTCG                                                                           | CCCCTC, GGGGG                                             |
| GSE11025   | ATCCGC                                                                             |                                                           |
| GSE11966   | CCGCCTCCC, ATCCGC                                                                  |                                                           |
| GSE13735   |                                                                                    | GCCCG                                                     |
| GSE14304   | GGGG, GCTCCTCG                                                                     | CTGGCC, GGTTGCC, GCCCG, GGTGCT, TCGCTC, GCCCTCCG, NotAorT |
| GSE14692   | ATCCGC                                                                             |                                                           |
| GSE15071   | CCGCCTCCC, CCCGCC, ATCCGC, CTGCCT, GGTGCT, TCGCTC, GCTCCTCG, NotAorT, CCCC, CCCCCG |                                                           |
| GSE16108   |                                                                                    | CTGGCC, GCCCTCCG, ACGCCA, GGGGG, CCCCTC, TCCCC            |
| GSE16341   | CCGCCTCCC, ATCCGC, CTGCCT, GGTGCT, GCTCCTCG, CCCC, CCCCCG                          | AGGCCA, GGGGG                                             |
| GSE16793   |                                                                                    | CTGGCC, GGTGCT                                            |
| GSE17245   |                                                                                    | GCCCTCCG, TCGCTC                                          |
| GSE18361   | ATCCGC                                                                             |                                                           |
| GSE19024   | CCGCCTCCC, ATCCGC                                                                  | CCCCTC, CTGGCC, GCCCTCCG, GGGGG, GCCG, GGTTGCC, TGGGG     |
| GSE19239   | ATCCGC                                                                             |                                                           |
| GSE22564   | ATCCGC, CTGGCC, TCGCCGCT, GGGG, NotAorT, CCCC, CCCCCG                              | GGTGCT, GCTCCTCG, GCCCG                                   |
| GSE24048   | CCGCCTCCC, ATCCGC                                                                  |                                                           |
| GSE24228   | ATCCGC                                                                             |                                                           |

There are 22 Rice experiments in the table above. There are a further three experiments containing at least 10 CEL files: GSE7951 (13 CEL files), GSE12069 (14), and GSE15046 (12). Two GSEs, 19024 and 22564, each contain about 200 CEL files.

## Soybean

| Experiment | Estimate relatively rarely important                         | Estimate relatively commonly important                |
|------------|--------------------------------------------------------------|-------------------------------------------------------|
| GSE6414    | ATCCGC, CTGCCT, CTGGCC, TCGCCGCT, GCCCTCCG, GTGGTTC, NotAorT | TCCCT, TCCCC                                          |
| GSE7124    | CCCCTC, CTGGCC, GCTCCTCG                                     | GGTGCT, TCGCTC, ACGCCA, NotAorT, GGGGG, GCCCG, CCCCCG |
| GSE7511    | ATCCGC, CTGGCC, TCGCCGCT, GCCCTCCG, NotAorT                  | TCCCT, TCCCC                                          |
| GSE7881    | ATCCGC, CTGGCC, TCGCCGCT, GCCCTCCG, NotAorT                  | TCCCT, TCCCC                                          |
| GSE8112    | ATCCGC, CTGGCC, TCGCCGCT, GCCCTCCG, GTGGTTC, NotAorT, CCCCCG | TCCCT, TCCCC                                          |
| GSE8432    |                                                              | ACGCCA                                                |
| GSE9687    | CCCCTC, CTGGCC, NotAorT                                      | AGGCCA, CTGGCC, GGTGCT, GGGGG, GCCCG, NotAorT, CCCCCG |
| GSE11611   | CCCCTC, GCCCTCCG, GTGGTTC, ACGCCA, CCCCCG                    | AGGCCA, GGTGCT, TCGCTC, GCCCG, GGGGG, NotAorT         |
| GSE13631   | CTGGCC, GGTTGCC                                              | GGTGCT, ACGCCA                                        |

Nine experiments are listed above. There are two other experiments with at least 10 CEL files: 9374, (25 CEL files) and 10251 (10 CEL files). The bulk of the CEL files (more than 2500) come from GSE11611, while both GSE7124 and GSE9687 include over 100 CEL files.

### Drosophila — Drosgenome

| Experiment | Estimate relatively rarely important | Estimate relatively commonly important |
|------------|--------------------------------------|----------------------------------------|
| GSE3057    | CCGCCTCCC, ATCCGC                    |                                        |
| GSE3069    | CCGCCTCCC                            |                                        |
| GSE3830    | CCGCCTCCC                            |                                        |
| GSE3842    | CCGCCTCCC                            | GGTTGCCC, GCTCCTCG                     |
| GSE3854    |                                      | ATCCGC, CTGCCT, GGTTGCCC, GCTCCTCG     |
| GSE4174    |                                      | CTGCCT, GCTCCTCG                       |
| GSE4188    | CCGCCTCCC, ATCCGC                    |                                        |
| GSE4235    |                                      | GCTCCTCG                               |
| GSE6515    | CCGCCTCCC, ATCCGC                    | GCTCCTCG                               |
| GSE6542    | ATCCGC                               |                                        |
| GSE6558    | CCGCCTCCC, ATCCGC                    |                                        |
| GSE7110    | CCGCCTCCC, ATCCGC, GGGG, GCCCG       | GTGGTTC, GGTTGCCC,                     |
| GSE7159    | GGGG                                 | CTGCCT                                 |
| GSE7655    |                                      | GGGGG                                  |
| GSE7873    | GGGG                                 | CTGCCT, GCTCCTCG                       |
| GSE9425    | GGGG                                 |                                        |
| GSE9889    |                                      | CTGCCT                                 |
| GSE10012   | ATCCGC                               | CCCCC, CCCCCG                          |
| GSE10013   |                                      | CCCCG                                  |
| GSE10014   | ATCCGC                               | CCCCC, CCCCCG                          |
| GSE12477   | GGGG                                 |                                        |
| GSE27376   | GGGG                                 |                                        |

The table above includes 22 experiments. There are 16 other experiments with at least 10 CEL files: GSE2780 (10 CEL files), GSE2828 (12), GSE3060 (12), GSE3826 (12), GSE3828 (12), GSE3829 (12), GSE3831 (12), GSE3832 (12), GSE6490 (12), GSE6491 (12), GSE6492 (12), GSE6493 (12), GSE8751 (30), GSE9088 (30), GSE9149 (29), and GSE11203 (24).

## Drosophila — Drosgenome\_2

| Experiment | Estimate relatively rarely important                         | Estimate relatively commonly important       |
|------------|--------------------------------------------------------------|----------------------------------------------|
| GSE2863    | CCCCC                                                        | ACGCCA, GGGG                                 |
| GSE5404    | CCCCC                                                        | CTGCCT, ACGCCA, GGGGG                        |
| GSE5430    |                                                              | ACGCCA                                       |
| GSE7614    | CCCCC                                                        |                                              |
| GSE7763    | CCGCCTCCC, ATCCGC, NotAorT, CCCCC                            | CTGGCT, CTGGCC, GGGG, NotAorT, CCCCC, ACGCCA |
| GSE8623    |                                                              | CTGCCT                                       |
| GSE8775    | CCCCC                                                        |                                              |
| GSE8892    | NotAorT, CCCCC, CCCCCG, GCCCCG                               | GGGG, GGGGG, TGGGG                           |
| GSE8938    |                                                              | CTGCCT, GGGG                                 |
| GSE9107    | CCCCC, CCCCCG                                                | CTGCCT, TCGCTC, ACGCCA, GGGG, GGGGG          |
| GSE9552    | CCCCC                                                        | ACGCCA                                       |
| GSE23344   | CCGCCTCCC, ATCCGC, NotAorT, CCCCCG, GCCCCG                   |                                              |
| GSE23802   | CCGCCTCCC, ATCCGC, ACGCCA                                    | GGGG                                         |
| GSE23880   |                                                              | CCCCC                                        |
| GSE24167   |                                                              | CTGCCT, GGGGG                                |
| GSE24503   | CCGCCTCCC, ATCCGC, NotAorT, CCCCC, CCCCCG, GCCCCG            | GGGGG                                        |
| GSE24729   | CCGCCTCCC, ATCCGC, GGGG, CCCCC                               | GGGG, GGGGG, TGGGG                           |
| GSE24917   | CCGCCTCCC, ATCCGC, NotAorT, CCCCCG, GCCCCG                   |                                              |
| GSE25267   | CCGCCTCCC, ATCCGC                                            | GGGG                                         |
| GSE26246   | NotAorT                                                      | GGGG, TGGGG, CCCCC                           |
| GSE26726   | GGGG, CCCCC                                                  |                                              |
| GSE27345   | GGGG                                                         | CTGCCT, ACGCCA                               |
| GSE27376   |                                                              | CTGCCT, ACGCCA                               |
| GSE27927   | CCGCCTCCC, ATCCGC, ACGCCA, TCGCCGCT, NotAorT, CCCCCG, GCCCCG |                                              |
| GSE28728   | CCCCG                                                        | GGGG, CCCCC                                  |
| GSE29203   |                                                              | ACGCCA                                       |
| GSE29815   |                                                              | CTGCCT, ACGCCA                               |
| GSE30020   |                                                              | CTGCCT, TCGCTC, GCTCCTCG, GGGG               |
| GSE30360   | CCGCCTCCC, ATCCGC                                            | TGGGG                                        |
| GSE31564   | GGGG, CCCCC                                                  | AGGCCA                                       |

Thirty experiments are listed above. There are eight other experiments with at least 10 CEL files: GSE4032 (12 CEL files), GSE8330 (12), GSE24156 (15), GSE24167 (15), GSE24978 (12), GSE26717 (12), GSE27178 (20), and GSE28147 (12). Only GSE7763 contains more than 100 CEL files.

## Dependence on position of motif in probe

Mean values of estimates ( $\times 100$ ) arranged as vectors suitable for inclusion in an R program. A selection of these values appear in Figure 3 of the paper after the application of the Friedman smoother (R's *supsmu* function).

nC=c(44,103,144,145,111,98,154,86,146,113,118,45,78,84,59,18,64,26,18,39,82 )  
 nA=c(-3,-37,-13, -8,-39,-7,-40,-31,-213,-3,5, -16,-241, -49,-43,-34,-5,13,-28,-12,-9)  
 nG=c(26,124,138,124,83,114,112,107,-81,167,146,116,-113,74,56,66, 87,58,56,76,56)  
 nCCGCCTCCC=c(43,47,54,59,61,72,67,56,57,52,62,40,44,58,59,72,64,67,61,46,36)  
 nCCCCTC=c(9,23,25,36,38,37,35,26,32,20,28,13,23,23,24,38,36,30,29,23,19 )  
 nCCCGCCCC=c(45,54,50,49,46,47,49,48,41,33,26,41,34,36, 58,52,41,37,34,22,13)  
 nATCCGC=c(29,30,27,31,28,26,26,37,25,-8,45,47,22,36,33,47,33,23,30,14, 6)  
 nAGCCA=c(-9,-20,-24,-19,-23,-27,-23,-21,-22,-16,-22,-23,-19,-23,-21,-24, -22,-21,-15,-19,-14,)  
 nCTGCCT=c(18,25,26,25,27,24,23,22,20,24, 22,16,22,21, 27,28,24,21,16,12,9)  
 nCTGCC=c(-16,-20,-17,-19,-27,-19,-14,-13,-22,-15,-19,-6,-19,-18, -18,-23,-18,-10,-8,-8,-9)  
 nTCGCCGT=c(25,34,33,27,23,22,26,30,25,34,12,26,28, 28,27,32,39,26,25,15,9)  
 nTCGCTC=c(4,25,18,24,14,17,20,9,14,25,-10,-4,-2, 22,5,20,16,13,18,4,15)nGGTGCT=c(-3,-3,1,0,0,1,4,7,4,9,3,6,2,8,15,8,5,4,6,-1,1)  
 nGGTTGCC=c(3,15,8,12,11,10,8,4,7,6,3,4,8, 10,11,12,11,14,10,7,1)  
 nGCTCCTCG=c(13,15,15,18,19,23,18,18,16,16,19,17,12,10,14,20,17,19,12,10,9 )  
 nACGCCA=c(22,18,24,16,11,17,11,17,22,24,14,3,2,21,23,19,24,12,7, 10,9)  
 nTCCCT=c(-4,13,18,20,31,24,30,25,28,30,27,19,14,12,18,26,24,27,25,30,26)  
 nGGGG=c(88,56,54,46,38,30,28,24,22,18,22,21,24, 21,24,37,26,27,26,24,46)  
 nGGGGG=c(0,-6,2,8,9,19,6,8,12,3,5,3,14, 14,22,33,21,22,28,28,46)  
 nTGGGG=c(-62,-34,-27,-20,-19,-14,-15,-12,-6,-15,-14,-8,-28,-9,-12,-14,-9,-11,-10,-13, -13)  
 nNotAorT=c(-11,-20,-21,-19,-18,-18,-18,-18,-15,-14,-13,-10,-16, -13,-16,-15,-15,-13,-15,-12,-16)  
 nCCCC=c(26,56,67,74,81,79,79,88, 72,60,82,42,57,34,72,76,82,68,63,50,36)  
 nCCCCG=c(-3,8,14,26,27,30,19,29,16,42,22,41, 25,28,31,23,27,39,35,30,37)  
 nTCCCC=c(-13,14,24,29,26,29,32,34,29,30,27,25,13,25,14,28,33,27,31,31,17 )  
 nRSQ=c(81,88,89,88,88,88,90,91,91,82,79,76,87,87, 83,83,79,77,75,74,76)
